# Supplementary material
Source: ML conference proceedings conference paper supplement (https://openreview.net/forum?id=2UyqK45_djA)
Supplement: supplementary_material [file attachment]

# 485 Appendices

## 486 A Algorithm

---

### Algorithm 1 Decoupled Policy Optimization

---

```

1: Input: State-only expert demonstration data  $\mathcal{D} = \{(s_i)\}_{i=1}^N$ , empty replay buffer  $\mathcal{B}$ , randomly
   initialized discriminator model  $D_\phi$ , state transition predictor  $h_\psi$  and parameterized inverse
   dynamics model  $I_\phi$ ;
2: for  $k = 0, 1, 2, \dots$  do ▷ Pre-training stage
3:   Collect trajectories  $\{(s, a, s', r, \text{done})\}$  using a random initialized policy  $\pi = I_\phi(h_\psi)$  and
   store in  $\mathcal{B}$ 
4:   Sample  $(s, a, s') \sim \mathcal{B}$  and update  $\phi$  by  $\mathcal{L}_\phi(I)$ 
5:   Sample  $(s, s') \sim \mathcal{D}$  and update  $\psi$  by  $\mathcal{L}_\psi^h$ 
6: end for
7: for  $k = 0, 1, 2, \dots$  do ▷ Online training stage
8:   Collect trajectories  $\{(s, a, s', r, \text{done})\}$  using current policy  $\pi = I_\phi(h_\psi)$  and store in  $\mathcal{B}$ 
9:   Sample  $(s, a, s') \sim \mathcal{B}, (s, s') \sim \mathcal{D}$ 
10:  Update the discriminator  $D_\omega$  with the loss:
      
$$\mathcal{L}_\omega^D = -\mathbb{E}_{(s,s') \sim \mathcal{B}}[\log D_\omega(s, s')] - \mathbb{E}_{(s,s') \sim \mathcal{D}}[\log (1 - D_\omega(s, s'))], \quad (17)$$

11:  Update  $\phi, \psi$  by  $\mathcal{L}_{\phi, \psi}^{h, I}$ 
12: end for

```

---

## 487 B Proofs

488 **Proposition 1.** Suppose  $\Pi$  is the policy space and  $\mathcal{P} = \{\rho : \rho \geq 0\}$  is a feasible set of OM, then a  
489 policy  $\pi \in \Pi$  corresponds to one state transition OM  $\rho_\pi \in \mathcal{P}$ . However, a state transition OM  $\rho \in \mathcal{P}$   
490 can correspond to more than one policy in  $\Pi$ .

491 *Proof.* This is a trivial conclusion and we briefly explain a proof scratch. First, there is a one-to-one  
492 correspondence between the state-action OM and the policy since  $\pi = \rho(s, a) / \int_{a^*} \rho(s, a^*) da^*$ .  
493 Then it is easy to derive that there is a one-to-one correspondence between the joint OM and the  
494 policy since  $\pi = \int_{s'^*} \rho(s, a, s'^*) ds'^* / \int_{a^*, s'^*} \rho(s, a^*, s'^*) da^* ds'^*$ . The state transition OM can be  
495 obtained via marginalizing the policy  $\rho(s, s') = \int_{a^*} \rho(s, a^*, s') da^* \int_{a^*, s'^*} \pi(a|s) \mathcal{T}(s'|s, a) da^* s'^*$ .  
496 As a result, there is no one-to-one correspondence between  $\rho(s, s')$  and  $\pi(a|s)$ .  $\square$

497 **Theorem 1** (Error Bound of DPO). Consider a deterministic environment whose transition function  
498  $\mathcal{T}(s, a)$  is deterministic and  $L$ -Lipschitz. Assume the ground-truth state transition  $h_{\Omega_E}(s)$  is deter-  
499 ministic, and for each policy  $\pi \in \Pi$ , its inverse dynamics  $I_\pi$  is also deterministic and  $C$ -Lipschitz.  
500 Then for any state  $s$ , the distance between the desired state  $s'_E$  and reaching state  $s'$  sampled by the  
501 decoupled policy is bounded by:

$$\|s' - s'_E\| \leq LC\|h_{\Omega_E}(s) - h_\psi(s)\| + L\|I_{\tilde{\pi}}(s, \hat{s}') - I_\phi(s, \hat{s}')\|, \quad (18)$$

502 where  $\tilde{\pi}$  is a sampling policy that covers the state transition support of the expert hyper-policy and  
503  $\hat{s}' = h_\psi(s)$  is the predicted consecutive state.

504 *Proof.* Given a state  $s$ , the expert takes a step in a deterministic environment and get  $s'$ . We assume  
505 that the expert  $\Omega_E$  can use any feasible policy  $\tilde{\pi}$  that covers the support of  $\Omega_E$  to reach  $s$ :

$$s'_E = \mathcal{T}(s, I_{\tilde{\pi}}(s, h_\Omega(s))) \quad (19)$$

506 Similarly, using decoupled policy, the agent predict  $\hat{s}' = h_\psi(s)$  and infer an executing action by an  
507 inverse dynamics model  $a = I_\phi(s, s')$ , which is learned from the sampling policy  $\tilde{\pi}$ . Denote the  
508 reaching state of the agent as  $s'$ :

$$s' = \mathcal{T}(s, I_\phi(s, h_\psi(s))) \quad (20)$$

509 Therefore, the distance between  $s'$  and  $s'_E$  is:

$$\|s' - s'_E\| = \|\mathcal{T}(s, I_{\tilde{\pi}}(s, h_{\Omega}(s))) - \mathcal{T}(s, I_{\phi}(s, h_{\psi}(s)))\|$$

510 Lets consider the deterministic transition on  $s$  is a function of  $a$  such that  $s' = \mathcal{T}^s(a)$ , then we  
511 continue the deviation:

$$\begin{aligned} \|s' - s'_E\| &\leq \|\mathcal{T}^s(I_{\tilde{\pi}}(s, h_{\Omega}(s))) - \mathcal{T}^s(I_{\phi}(s, h_{\psi}(s)))\| \\ &\leq L\|I_{\tilde{\pi}}(s, h_{\Omega}(s)) - I_{\phi}(s, h_{\psi}(s))\| \\ &\leq L\|I_{\tilde{\pi}}(s, h_{\Omega}(s)) - I_{\phi}(s, h_{\psi}(s))\| \\ &\leq L\|I_{\tilde{\pi}}(s, h_{\Omega}(s)) - I_{\tilde{\pi}}(s, h_{\psi}(s)) + I_{\tilde{\pi}}(s, h_{\psi}(s)) - I_{\phi}(s, h_{\psi}(s))\| \end{aligned}$$

512 Similarly we also take the inverse transition on  $s$  is a function of  $s'$  such that  $a = I^s(s')$ , then we  
513 have that:

$$\begin{aligned} \|s' - s'_E\| &\leq L\|I_{\tilde{\pi}}^s(h_{\Omega}(s)) - I_{\tilde{\pi}}^s(h_{\psi}(s)) \\ &\quad + I_{\tilde{\pi}}^s(h_{\psi}(s)) - I_{\phi}^s(h_{\psi}(s))\| \\ &\leq L\|I_{\tilde{\pi}}^s(h_{\Omega}(s)) - I_{\tilde{\pi}}^s(h_{\psi}(s))\| + L\|I_{\tilde{\pi}}^s(h_{\psi}(s)) - I_{\phi}^s(h_{\psi}(s))\| \\ &\leq LC\|h_{\Omega}(s) - h_{\psi}(s)\| + L\|I_{\tilde{\pi}}^s(\hat{s}') - I_{\phi}^s(\hat{s}')\|. \end{aligned} \tag{21}$$

514

□

515 **Theorem 2** (Error Bound of BCO). *Consider a deterministic environment whose transition function*  
516  *$\mathcal{T}(s, a)$  is deterministic and  $L$ -Lipschitz, and a parameterized policy  $\pi_{\psi}(a|s)$  that learns from the*  
517 *label provided by a parameterized inverse dynamics model  $I_{\phi}$ . Then for any state  $s$ , the distance*  
518 *between the desired state  $s'_E$  and reaching state  $s'$  sampled by a state-to-action policy as BCO [22]*  
519 *is bounded by:*

$$\begin{aligned} \|s' - s'_E\| &\leq L\left\|\pi_{\psi}(a|s) - \int_{s'^*} p_{\pi_E}(s'^*|s) I_{\phi}(a|s, s'^*) ds'^*\right\| \\ &\quad + L\left\|\int_{s'^*} p_{\pi_E}(s'^*|s) I_{\tilde{\pi}}(a|s, s'^*) - p_{\pi_E}(s'^*|s) I_{\phi}(a|s, s'^*) ds'^*\right\|, \end{aligned} \tag{22}$$

520 where  $\tilde{\pi} \in \omega_E$  is a policy instance of the expert hyper-policy  $\omega_E$  such that  $\mathcal{T}(s, \tilde{\pi}(s)) = s'_E$ .

*Proof.*

$$\begin{aligned} \|s' - s'_E\| &= \|\mathcal{T}(s, \pi_{\psi}(s)) - \mathcal{T}(s, \tilde{\pi}(s))\| \\ &= \|\mathcal{T}^s(\pi_{\psi}(s)) - \mathcal{T}^s(\tilde{\pi}(s))\| \\ &\leq L\|\tilde{\pi}(a|s) - \pi_{\psi}(a|s)\| \\ &= L\left\|\pi_{\psi}(a|s) - \int_{s'^*} p_{\pi_E}(s'^*|s) I_{\phi}(a|s, s'^*) ds'^*\right. \\ &\quad \left.+ \int_{s'^*} p_{\pi_E}(s'^*|s) I_{\phi}(a|s, s'^*) ds'^* - \int_{s'^*} p_{\pi_E}(s'^*|s) I_{\tilde{\pi}}(a|s, s'^*) ds'^*\right\| \\ &\leq L\left\|\pi_{\psi}(a|s) - \int_{s'^*} p_{\pi_E}(s'^*|s) I_{\phi}(a|s, s'^*) ds'^*\right\| \\ &\quad + L\left\|\int_{s'^*} p_{\pi_E}(s'^*|s) I_{\tilde{\pi}}(a|s, s'^*) - p_{\pi_E}(s'^*|s) I_{\phi}(a|s, s'^*) ds'^*\right\| \end{aligned} \tag{23}$$

521

□

522 An intuitive explanation for the bound is that BCO [22] first seeks to recover a policy that shares the  
523 same hyper-policy with  $\pi_E$  via learning an inverse dynamics model and then try to conduct behavior  
524 cloning. Therefore the errors comes from the reconstruction error of  $\tilde{\pi}$  using  $I_{\phi}$  (the second term)  
525 and the fitting error of behavior cloning (the first term).

526 By comparing Theorem 1 and Theorem 2, it is observed that for reaching each state, BCO requires a  
527 good inverse dynamics model over the state space to construct  $\tilde{\pi}$  and then conduct imitation learning  
528 to  $\tilde{\pi}$ , while DPO only requires to learn a good inverse dynamics model on the predicted state and  
529 directly construct  $\tilde{\pi}$  without the second behavior cloning step. This intuition meets our evaluation  
530 results in experiment Section 5.1.

## C State Transition Occupancy Measure Matching

In the literature of inverse reinforcement learning [21, 1, 4], the ambiguity comes from the multiple answer for matching the feature of the expert demonstrations. A feasible solution to this problem is the maximum entropy principle that models the expert data with probability models. In a recent work [17], the authors show that state-action OM matching corresponds to maximum entropy reinforcement learning. Specifically, consider modeling the state-action OM with the Boltzmann distribution as  $\rho_\pi(s, a) \propto \exp r(s, a)$ , then we have that:

$$\begin{aligned}
D_{\text{KL}}(\rho_\pi(s, a) \parallel \rho_{\pi_E}(s, a)) &= \sum_{s, a} \rho_\pi(s, a) \log \frac{\rho_\pi(s, a)}{\rho_{\pi_E}(s, a)} \\
&= \sum_{s, a} \rho_\pi(s, a) (-r(s, a) + \log \rho_\pi(s, a)) + \text{const} \\
&= \mathbb{E}_\pi [-r(s, a)] + \sum_{s, a} \rho_\pi(s, a) \log \rho_\pi(s, a) + \text{const} \\
&= \mathbb{E}_\pi [-r(s, a)] + \sum_{s, a} \rho_\pi(s, a) \log (\rho_\pi(s) \pi(a|s)) + \text{const} \\
&= \mathbb{E}_\pi [-r(s, a)] - H(\pi(a|s)) - H(\rho_\pi(s)) + \text{const} \\
&\leq \mathbb{E}_\pi [-r(s, a)] - H(\pi(a|s)) + \text{const},
\end{aligned} \tag{24}$$

Therefore, maximizing the entropy of the state-action OM accounts for maximizing the entropy of the policy such that conducting maximum entropy reinforcement learning with a recovered reward corresponds to the upper bound of the state-action OM matching problem. Similarly, if we model the state transition OM with the Boltzmann distribution as  $\rho_\pi(s, s') \propto \exp r(s, s')$ , then:

$$\begin{aligned}
D_{\text{KL}}(\rho_\pi(s, s') \parallel \rho_{\pi_E}(s, s')) &= \sum_{s, s'} \rho_\pi(s, s') \log \frac{\rho_\pi(s, s')}{\rho_{\pi_E}(s, s')} \\
&= \sum_{s, s'} \rho_\pi(s, s') (-r(s, s') + \log \rho_\pi(s, s')) + \text{const} \\
&= \mathbb{E}_\pi [-r(s, s')] + \sum_{s, s'} \rho_\pi(s, s') \log \rho_\pi(s, s') + \text{const} \\
&= \mathbb{E}_\pi [-r(s, s')] + \sum_{s, s'} \rho_\pi(s, s') \log \rho_\pi(s, s') + \text{const} \\
&= \mathbb{E}_\pi [-r(s, s')] - H(\rho_\pi(s, s')) + \text{const}.
\end{aligned} \tag{25}$$

However, maximum the entropy of the state-transition OM  $\rho_\pi(s, s') = \int_a \pi(a|s) \rho_\pi(s) T(s'|s, a) da$  does not account for maximizing the entropy of the policy, and therefore can not alleviate the ambiguity.

## D Experiments

### D.1 Experiment Settings

#### D.1.1 Real-World Traffic Dataset

NGSIM I-80 dataset includes three videos with a total length of 45 minutes recorded in a fixed area, from which 5596 driving trajectories of different vehicles can be obtained. We choose 85% of these trajectories as the training set and the remaining 15% as the test set. In our experiment, the state space includes the position and velocity vectors of the ego vehicle and six neighbor vehicles and the actions are acceleration and the change in steering angle.

### D.2 Implementation Details

For all experiments, we implement the decoupled policy network, value network as two-layer MLPs with 256 hidden units and the discriminator as 128 hidden units. For Mujoco benchmarks, we train

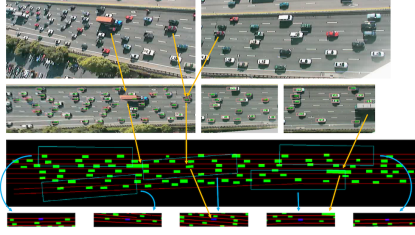

Figure 7: Visualization of NGSIM I-80 data set and its mapping on the simulator. This figure is borrowed from [9].

an SAC agent to collect expert data, and take it for training the imitation learning agents without any normalization. At training time we remove the terminal state and episode will end until 1000 steps. At testing time the terminal state are set for fair comparison.

For NGSIM driving experiment, the original state contains the information of other cars, which is hard to predict. Therefore, we ignore it when predicting the state transition and the action of inverse dynamics. During training, we randomly pick one car to be controlled by the policy at the beginning of every episode, and we replay the other cars by data. The episode ends when cars collide or successfully get through the road. To reduce the sampling time in the driving simulator, we implemented parallel sampling using Python *multiprocessing* library. In practice, we ran 25 simulators to collect samples at the same time.

### D.3 Hyperparameters

We list the key hyperparameters of the best performance of DPO on each task in Tab. 4. For each task, we first fine-tune GAIfo to find good hyperparameters for generative adversarial training, depending on which we further fine-tune state predictor coefficient  $\lambda_h$  and inverse dynamics coefficient  $\lambda_I$  from a initial hyperparameter  $\lambda_h = 1.0$  and  $\lambda_I = 0.5$ . We find  $\lambda_h$  affects the performance most, along with the multi-step number  $k$  and the cycle loss. We also find that pre-training does not help a lot for the final performance, sometimes it will even deteriorate the training. Note that DPO needs at least 1-step rollout for training the state transition predictor.

Table 4: Hyperparameters of DPO.

| Environments                                   | Invert.  | InvDouble.   | Hop. | Walk. | Half.                   | Ant.                  | NGSIM. |
|------------------------------------------------|----------|--------------|------|-------|-------------------------|-----------------------|--------|
| Trajectory maximum length                      |          |              |      |       | 1000                    |                       | 1500   |
| Optimizer                                      |          |              |      |       | AdamOptimizer           |                       |        |
| Discount factor $\gamma$                       |          |              |      |       | 0.99                    |                       |        |
| Replay buffer size                             |          |              |      |       | 2e5                     |                       | 2e6    |
| Batch size                                     |          |              |      |       | 256                     |                       | 1024   |
| State predictor coefficient $\lambda_h$        |          | 1.0          |      |       | 0.35                    | 1.2                   | 1.0    |
| Tuning range of $\lambda_h$                    |          | [1.0]        |      |       | [0.3,0.35,0.45,0.5,1.0] | [0.9,1.0,1.1,1.2,1.3] | [1.0]  |
| Inverse dynamics coefficient $\lambda_I$       |          | 0.5          |      |       | 0.25                    | 0.5                   |        |
| Tuning range of $\lambda_I$                    |          | [0.5]        |      |       | [0.25,0.5]              | [0.5]                 |        |
| Generative adversarial coefficient $\lambda_G$ |          |              |      |       | 1.0                     |                       |        |
| Generative adversarial reward form             | $\log D$ | $-\log(1-D)$ |      |       | $\log D$                |                       |        |
| Multi-step $k$                                 | 1        |              | 3    | 1     | 2                       |                       | 1      |
| Cycle loss                                     |          | $\times$     |      |       | $\checkmark$            | $\times$              |        |
| Pre-train step                                 | 0        |              |      |       | 50000                   |                       | 0      |
| $Q$ learning rate                              |          |              |      |       | 3e-4                    |                       |        |
| $\pi$ learning rate                            |          |              |      |       | 3e-4                    |                       |        |
| $D$ learning rate                              |          |              |      |       | 3e-4                    |                       |        |
| Gradient penalty weight                        |          | 4.0          |      |       | 0.5                     |                       | 4.0    |
| Reward scale                                   |          |              |      |       | 2.0                     |                       |        |

### D.4 Distributional Evaluation Metric

Apart from the accumulated reward reported in Tab. 2, the performance of imitation learning methods should also be evaluated by distributional similarities to expert data. For example, in SOIL tasks we try to evaluate the KL divergence between policy and expert state transitions  $D_{KL}(\rho_{\pi_E}(s, s') || \rho_{\pi}(s, s'))$  for different methods. Since it is hard to compute the distributional distance in high-dimensional continuous control environments, we reduce the dimension of the input data to 2 dimensions. Specifi-

cally, we adopt UMAP [18], which maintains a mapping function that can be used for transforming new data collections. In our case, we first fit a UMAP model on the expert demonstration and then use it to transform  $(s, s')$  pairs collected by different algorithms. We first estimate the distribution via Kernel Density Estimation (KDE) [20] with Gaussian kernel to compute the Kullback-Leibler (KL) divergence, and show the qualitative results in Tab. 5. Furthermore, we visualize a 2 dimensional distributional density example of these trajectories on Halfcheetah in Fig. 8. Higher frequency positions in collected data are colored darker in the plane, and higher the value with respect to its marginal distributions. And it is noticeably that DPO does not reach a higher return but recover the better expert state transition occupancy measure.

Table 5: KL divergence between policy-sampled and the expert state transitions distribution.

|       | Hopper                            | Walker2d                          | HalfCheetah                       | Ant                               |
|-------|-----------------------------------|-----------------------------------|-----------------------------------|-----------------------------------|
| BCO   | <b><math>1.32 \pm 0.04</math></b> | $1.63 \pm 0.26$                   | $5.76 \pm 0.31$                   | $3.76 \pm 0.42$                   |
| GAIfO | $1.77 \pm 0.05$                   | $1.32 \pm 0.21$                   | $2.47 \pm 0.79$                   | <b><math>0.40 \pm 0.04</math></b> |
| DPO   | $1.76 \pm 0.05$                   | <b><math>1.13 \pm 0.09</math></b> | <b><math>1.68 \pm 0.16</math></b> | $0.48 \pm 0.06$                   |

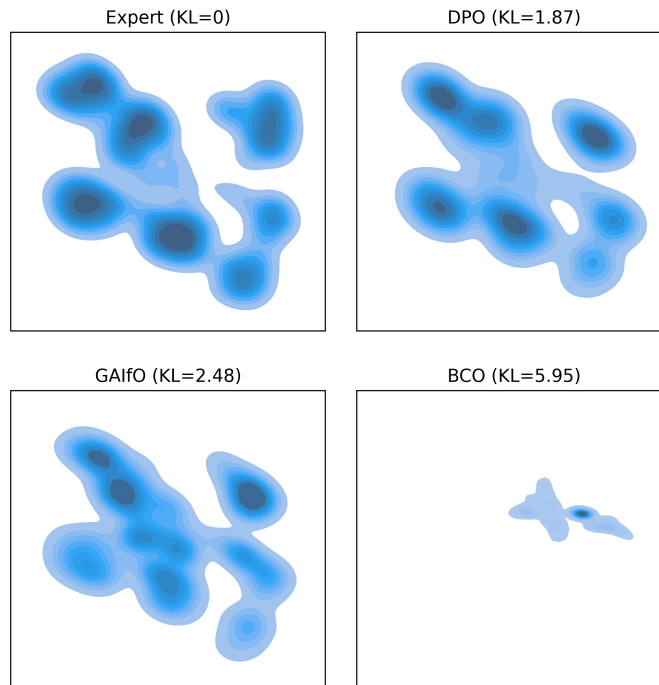

Figure 8: Visualization of sampled state transition distributions on HalfCheetah environment using UMAP reduction.

## D.5 Ablation Study

In this section we investigate the effect on different values of hyperparameter  $\lambda_h$ . As illustrated in Fig. 9, the final performance is robust upon a range of  $\lambda_h$ . However, we find it affects the sample efficiency and the optimal hyperparameter among different tasks differs.

## D.6 Empirical Correlation between Compounding Error and Reward

The motivation of DPO indicates that if the agent can exactly predict where the expert will go and then learn a skill to reach that place, it can solve SOIL efficiently. In previous sections we propose to evaluate the distance of the reaching states and the predicted consecutive states to quantify the compounding error. Interestingly, in our experiments, we do find that the compounding error has a

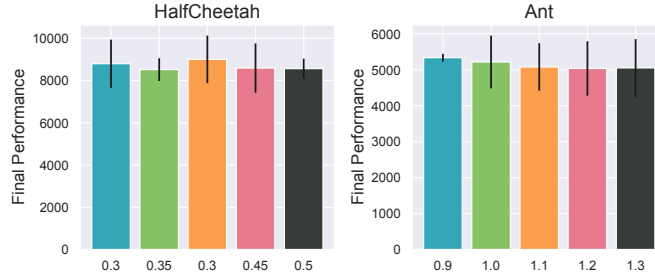

Figure 9: Hyperparameter study on  $\lambda_h$ .

great impact on the efficacy of DPO. Therefore, we analyze the empirical correlation between the prediction-real distance and the reward. Specifically, we sample several epochs from experiments with different hyperparameters on each tasks and draw the connection of its prediction-real distance and its reward. As shown in Fig. 10, lower distance always achieves higher performance, indicating the rationality of the intuition and the key ingredient for utilizing DPO.

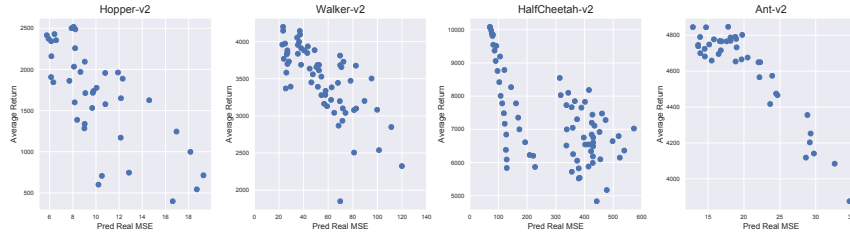

Figure 10: The empirical correlation between the prediction-real distance and the reward. Typically, less prediction-real distance achieves better performance

603 **D.7 Complete Evaluation Results**

604 In this section we show complete evaluation training curves of DPO with different regularization in  
605 Fig. 11. Typically, experiments with less prediction-real distance can achieve better performance.

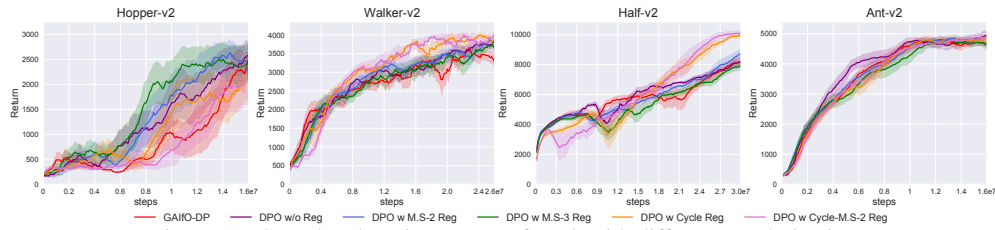

Figure 11: Complete learning curves of DPO with different regularization.
